# Supplementary material
Source: PubMed Central journal article supplement (PMC6555478)
Supplement: jamaoncol-5-1310-s001.pdf [file jamaoncol-5-1310-s001.pdf]

## Supplementary Online Content

Simonaggio A, Michot JM, Voisin AL, et al. Evaluation of readministration of immune checkpoint inhibitors after immune-related adverse events in patients with cancer. *JAMA Oncol*. Published online June 6, 2019.  
doi:10.1001/jamaoncol.2019.1022

**eFigure 1.** Study Design

**eFigure 2.** Outcome After Anti-PD-1 or Anti-PD-L1 Rechallenge

**eFigure 3.** Severity Grade: Comparison of the Initial and Second irAEs

**eFigure 4.** Kaplan-Meier Curves for PFS (A) and OS (B) in Patients in the Retreated Group (n = 40) and the Non-retreated Group (n=37)

**eTable.** Summary of the Main Studies of ICI Rechallenge After an irAE

This supplementary material has been provided by the authors to give readers additional information about their work.

## eFigure 1. Study Design

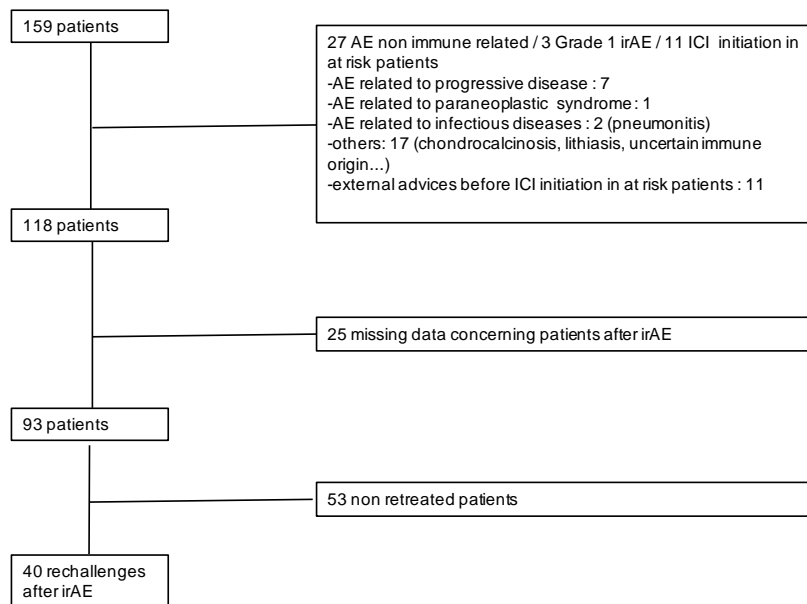

One hundred fifty-nine patients were referred to the ImmunoTOX board. Twenty-seven had no irAEs, 3 had Grade 1 irAE, 11 were addressed for guidance before anti-PD(L)-1 initiation and 25 had missing data concerning rechallenge (external advices). Ninety-three patients were analyzed for irAE description. Forty patients (40/93) were retreated with anti-PD(L)-1 after first irAE.

Abbreviations: AE: adverse event, irAE: immune related adverse event, ICI: immune checkpoint inhibitor.

**eFigure 2.** Outcome After Anti-PD-1 or Anti-PD-L1 Rechallenge

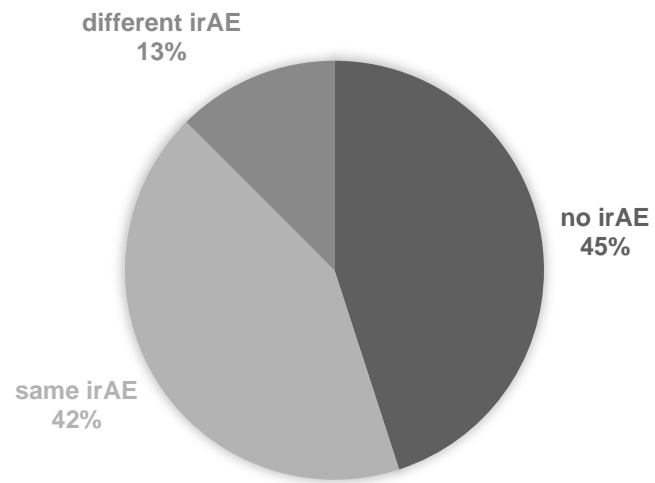

Abbreviations: irAE: immune related adverse events, anti PD-1 : anti-programmed cell death 1, anti-PD-L1 : anti-programmed death ligand 1

**eFigure 3. Severity Grade: Comparison of the Initial and Second irAEs**

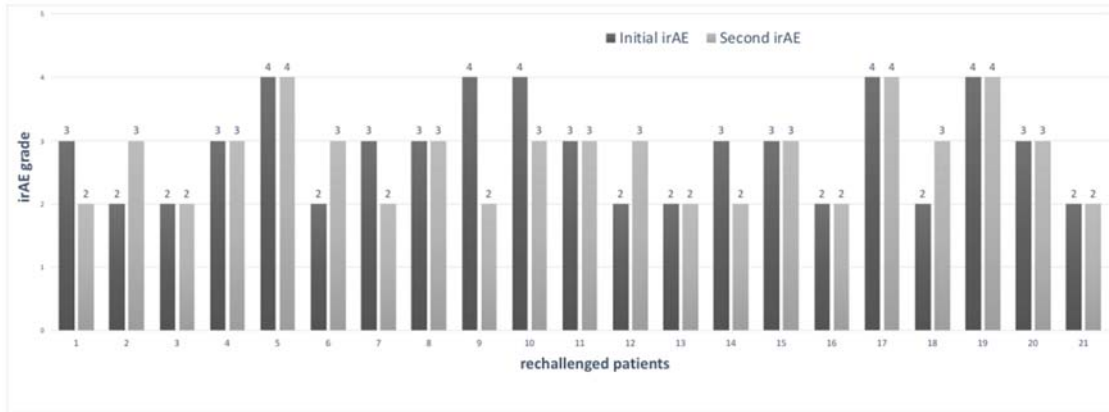

Abbreviations: irAE: immune related adverse events

**eFigure 4.** Kaplan-Meier Curves for PFS (A) and OS (B) in Patients in the Retreated Group (n = 40) and the Non-retreated Group (n=37)

(A)

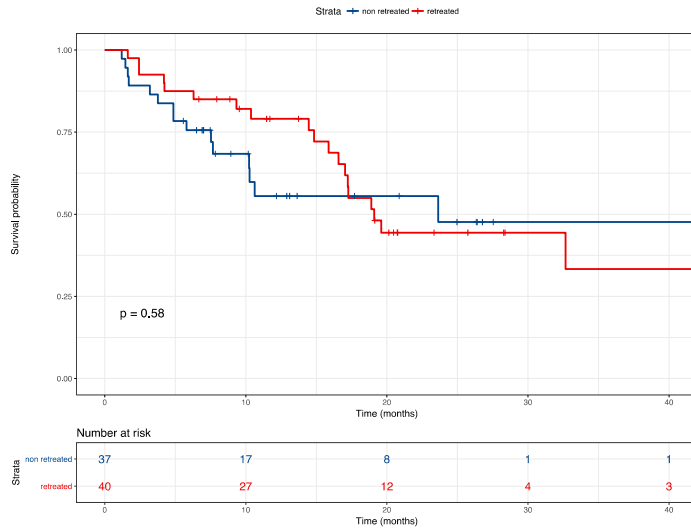

(B)

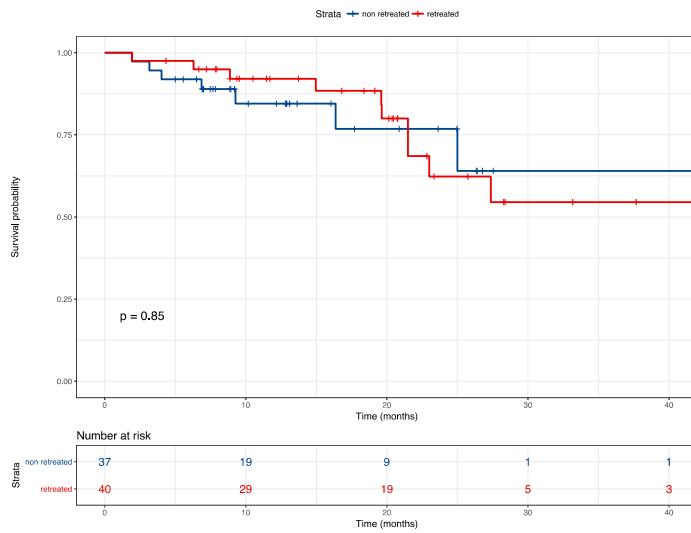

**eTable.** Summary of the Main Studies of ICI Rechallenge After an irAE

| Reference          | Study                      | Tumor type                                | Initial ICI                            | ICI rechallenge      | N  | N rechallenged | toxicities                                                                                                                           | Outcome / recurrence                                                 | comments                                                                                                                                                                     |
|--------------------|----------------------------|-------------------------------------------|----------------------------------------|----------------------|----|----------------|--------------------------------------------------------------------------------------------------------------------------------------|----------------------------------------------------------------------|------------------------------------------------------------------------------------------------------------------------------------------------------------------------------|
| Spain et al. 22    | Case report                | Metastatic melanoma                       | Nivolumab ipilimumab                   | Nivolumab ipilimumab | 3  | 3              | G3 meningitis<br>G3 hepatitis<br>G3 colitis                                                                                          | 2 patients experienced irAE recurrence (G4 cytolytic ans G3 colitis) | No death after rechallenge                                                                                                                                                   |
| Pollack et al. 23  | Retrospective multicentric | Metastatic melanoma                       | Nivolumab ipilimumab                   | Anti PD1             | 80 | 80             | Colitis: 41%<br>Hepatitis: 36%<br>Rash: 6%<br>Hypophysitis: 5%<br>Pneumonitis: 4%<br><br>Grade 2: 31%<br>Grade 3: 61%<br>Grade 4: 8% | 18%: recurrence if the same irAE<br>21%: occurrence of a new irAE    | One death after rechallenge (G5 Steven-Johnson Syndrome)<br><br>Duration of steroid taper, initial irAE severity, use of IS drug did not predict for toxicity on rechallenge |
| Sanini et al. 24   | Retrospective multicentric | NSCLC                                     | Anti PD(L)1                            | Anti PD(L)1          | 71 | 19             | Pneumonitis: 21%<br>Colitis: 17%<br>Hepatitis: 13%<br><br>Grade 2: 54%<br>Grade 3: 42%                                               | 26% same irAE<br>23% new irAE<br>51% no subsequent irAE              | 2 deaths after rechallenge<br><br>Shorter duration of treatment before 1st irAE (<3 months) and hospitalization were associated with irAE recurrence after rechallenge       |
| DeLaunay et al. 27 | Retrospective multicentric | Melanoma NSCLC                            | Anti PD(L)1; 93.1%<br>Anti CTLA4: 6.9% | Anti PD(L)1          | 64 | 10             | Pneumonitis<br><br>Grade 1: 15.6%<br>Grade 2/3: 65.6%<br>Grade 4: 9.4%<br>Grade 5: 9.4%                                              | 3 Pneumonitis recurrence (33.3%)                                     | No death after rechallenge<br>Duration of treatment before pneumonitis was shorter among NSCLC cohort (2.1 months vs. 5.2 months in melanoma cohort)                         |
| Naidoo et al. 17   | Retrospective multicentric | Melanoma NSCLC, bladder, lymphoma, others | Anti PD(L)1 +/- anti CTLA4             | Anti PD(L)1          | 49 | 12             | Pneumonitis<br><br>Grade 1: 40%<br>Grade 2: 33%<br>Grade 3: 23%                                                                      | 3 Pneumonitis recurrence (25%)                                       | No death after rechallenge                                                                                                                                                   |

Abbreviations: ICI: immune checkpoint inhibitor, irAE: immune related adverse events
